# Supplementary material for: Chemical composition and mixing state of BC-containing particles and the implications on light absorption enhancement
Source: Copernicus journal article supplement (doi:10.5194/acp-2021-904), 2021-11-26
Supplement: Supplementary file 1 [file acp-2021-904-supplement.pdf]

# Supplementary of

## Chemical composition and mixing state of BC-containing particles and their implications on light absorption enhancement

Jiaxing Sun<sup>1,2</sup>, Yele Sun<sup>1,2,3</sup>, Conghui Xie<sup>1,2, a</sup>, Weiqi Xu<sup>1</sup>, Chun Chen<sup>1,2</sup>, Zhe Wang<sup>1</sup>, Lei Li<sup>4,5</sup>, Xubing Du<sup>4,5</sup>, Fugui Huang<sup>6</sup>, Yan Li<sup>1,2</sup>, Zhijie Li<sup>1,2</sup>, Xiaole Pan<sup>1</sup>, Nan Ma<sup>7</sup>, Wanyun Xu<sup>8</sup>, Pingqing Fu<sup>9</sup>, and Zifa Wang<sup>1,2,3</sup>

<sup>1</sup>State Key Laboratory of Atmospheric Boundary Layer Physics and Atmospheric Chemistry, Institute of Atmospheric Physics, Chinese Academy of Sciences, Beijing 100029, China

<sup>2</sup>College of Earth and Planetary Sciences, University of Chinese Academy of Sciences, Beijing 100049, China

<sup>3</sup>Center for Excellence in Regional Atmospheric Environment, Institute of Urban Environment, Chinese Academy of Sciences, Xiamen 361021, China

<sup>4</sup>Institute of Mass Spectrometer and Atmospheric Environment, Jinan University, Guangzhou, 510632, China

<sup>5</sup>Guangdong Provincial Engineering Research Center for On-Line Source Apportionment System of Air Pollution, Guangzhou, 510632, China

<sup>6</sup>Guangzhou Hexin Analytical Instrument Company Limited, Guangzhou, 510530, China

<sup>7</sup>Institute for Environmental and Climate Research, Jinan University, Guangzhou 511443, China

<sup>8</sup>State Key Laboratory of Severe Weather & Key Laboratory for Atmospheric Chemistry, Institute of Atmospheric Composition, Chinese Academy of Meteorological Sciences, Beijing, 100081, China

<sup>9</sup>Institute of Surface-Earth System Science, Tianjin University, Tianjin 300072, China

<sup>a</sup>now at: State Key Joint Laboratory of Environmental Simulation and Pollution Control, College of Environmental Sciences and Engineering, Peking University, Beijing, 100871, China

**Correspondence:** Yele Sun ([sunyele@mail.iap.ac.cn](mailto:sunyele@mail.iap.ac.cn))

### Method of estimating the direct radiative forcing

Based on  $E_{\text{abs}}$  for each factor and the contribution of that factor to  $b_{\text{abs, BCpure}}$ , we further simply estimated the direct radiative forcing ( $\Delta F_R$ ) caused by BC-containing particles with their mixing state at the top-of-atmosphere (TOA), suggested by pervious study (Chylek and Wong, 1995; Chen and Bond, 2010). The modified version of the equation is given as below:

$$\Delta F_{R,fi} = \int -\frac{1}{4d\lambda} \tau_{atm}^2(\lambda)(1 - F_c)[(1 - a_s)^2 2\beta \tau_{scat,fi}(\lambda) - 4a_s \tau_{abs,fi}(\lambda)] d\lambda$$

where  $S$  is the solar irradiance ( $\text{W m}^{-2}$ ),  $\tau_{atm}$  is the atmospheric transmission (unitless),  $F_c$  is the fractional cloud amount (0.6 unitless),  $a_s$  is the surface reflectance (0.19 unitless),  $\beta$  is the backscatter fraction (0.29 unitless) (Charlson et al., 1992; Bond and Bergstrom, 2006; Wang et al., 2019), and  $\tau_{scat}$  and  $\tau_{abs}$  are the aerosol scattering and absorption optical depths (unitless), respectively. Wavelength-dependent  $S(\lambda)$  and  $\tau_{atm}(\lambda)$  are derived from the ASTM G173-03 reference spectra (Chen and Bond, 2010).  $\tau_{scat}$  and  $\tau_{abs}$  can be estimated as  $\tau_{scat}(\lambda) = b_{sca}(\lambda) \times \text{Heff}$  and  $\tau_{abs}(\lambda) = b_{abs}(\lambda)$

$E_{\text{abs}} \times \text{Heff}$ , respectively, where  $\text{Heff}$  is effective height (Wang et al., 2019) derived from the relationship between aerosol optical depth  $\tau$  ( $= \tau_{\text{scat}} + \tau_{\text{abs}}$ , available from the Aerosol Robotic Network data archive) and light extinction coefficient  $b_{\text{ext}}$  ( $= b_{\text{abs}} + b_{\text{sca}}$ , derived from PAX), shown in Figure S1. And  $\Delta F_{\text{R}}$  is the sum of all factor values of  $\Delta F_{\text{R},fi}$ .

**Table S1. A summary of abbreviations and descriptions of BC-containing particle types and organic aerosol factors.**

| Description of type or species                    | Abbreviation       |
|---------------------------------------------------|--------------------|
| BC only from biomass burning                      | BB <sub>pure</sub> |
| BC only from coal combustion                      | CC <sub>pure</sub> |
| BC only from traffic emission                     | TR <sub>pure</sub> |
| BC internally mixed more than one sources         | MixSource          |
| BC internally mixed with nitrate                  | BC <sub>N</sub>    |
| BC internally mixed with sulfate                  | BC <sub>S</sub>    |
| BC internally mixed with nitrate and sulfate      | BC <sub>NS</sub>   |
| BC internally mixed with OC and nitrate           | BCOC <sub>N</sub>  |
| BC internally mixed with OC and sulfate           | BCOC <sub>S</sub>  |
| BC internally mixed with OC, nitrate, and sulfate | BCOC <sub>NS</sub> |
| Biomass burning organic aerosol                   | BBOA               |
| Coal combustion organic aerosol                   | CCOA               |
| Fossil fuel-related organic aerosol               | FFOA               |
| Hydrocarbon-like organic aerosol                  | HOA                |
| Cooking organic aerosol                           | COA                |
| Oxygenated organic aerosol                        | OOA                |
| Aqueous-related organic aerosol                   | aq-OOA             |
| Less oxidized oxygenated organic aerosol          | LO-OOA             |
| More oxidized organic aerosol                     | MO-OOA             |

**Table S2. A summary of relationship between aerosol optical depth and light extinction coefficient measured by PAX at both sites.**

|                  | Beijing | Gucheng |
|------------------|---------|---------|
| Effective Height | 711     | 554     |
| (m, slope)       |         |         |
| $r$              | 0.73    | 0.51    |

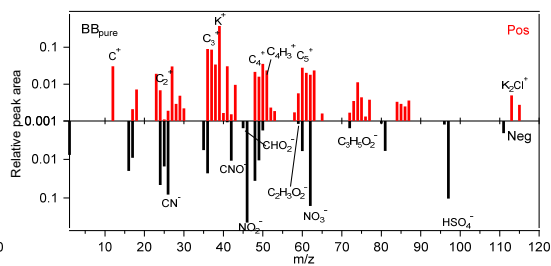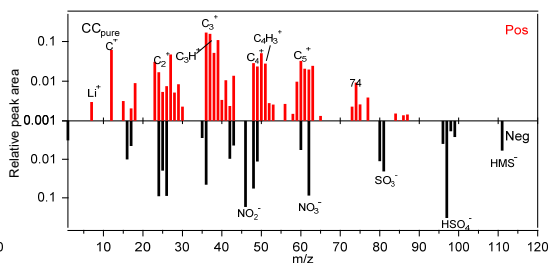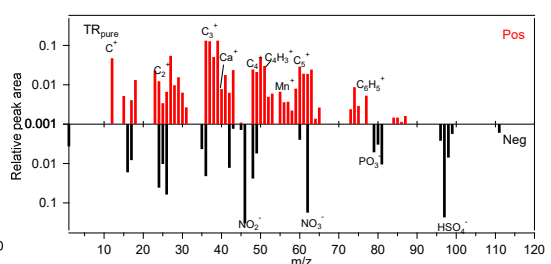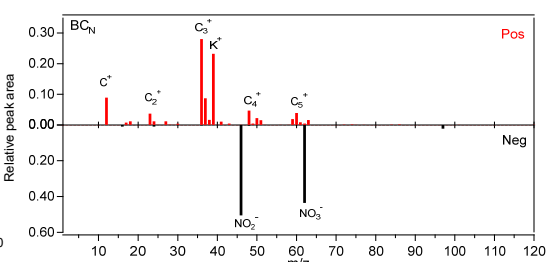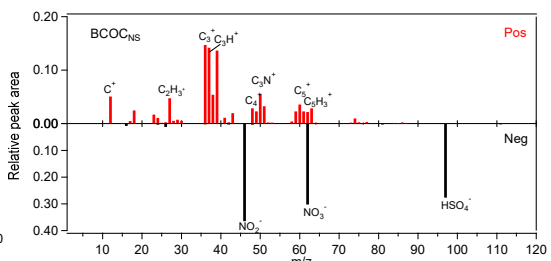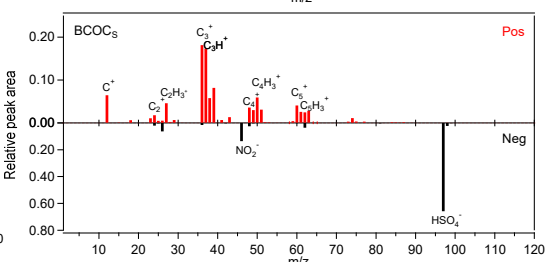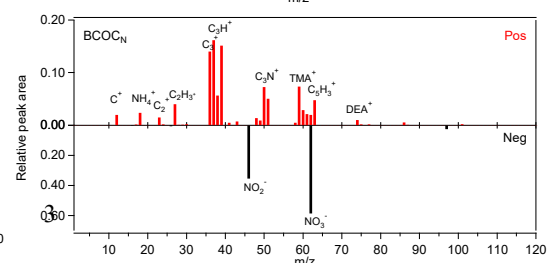

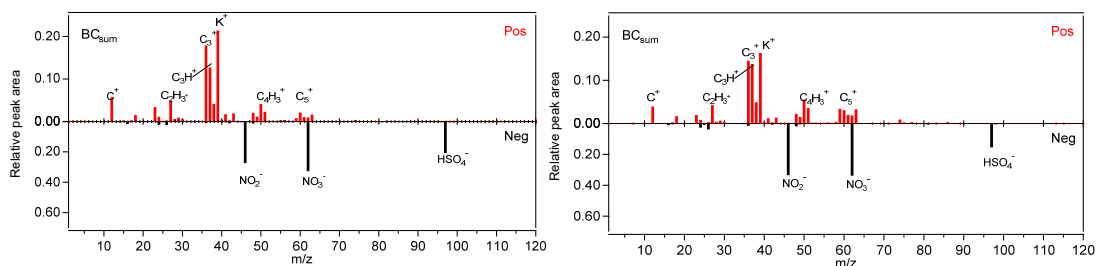

**Figure S1. Average mass spectra of six types of BC-containing particles and total BC- containing particles in Beijing (left panel) and Gucheng (right panel).**

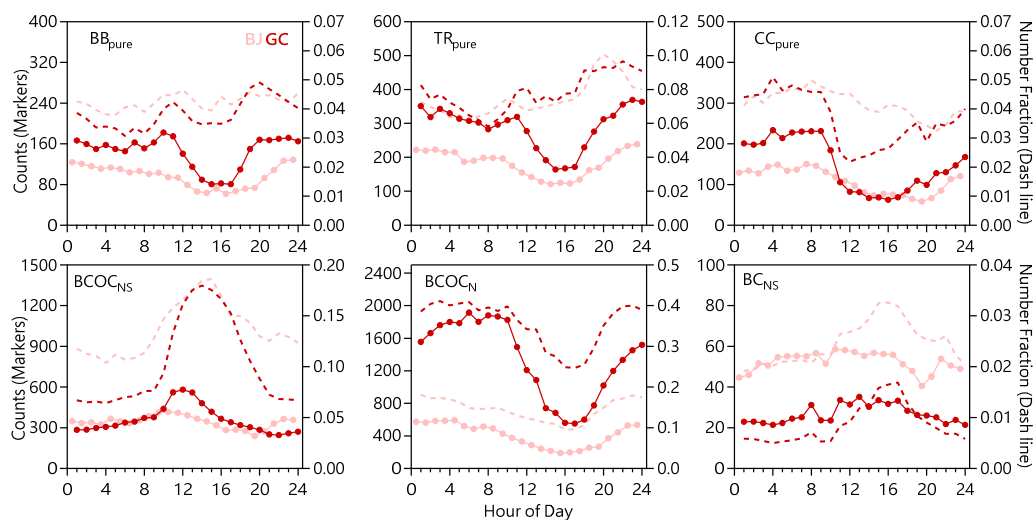

**Figure S2. Diurnal variations of six types of BC-containing particles in Beijing and Gucheng.**

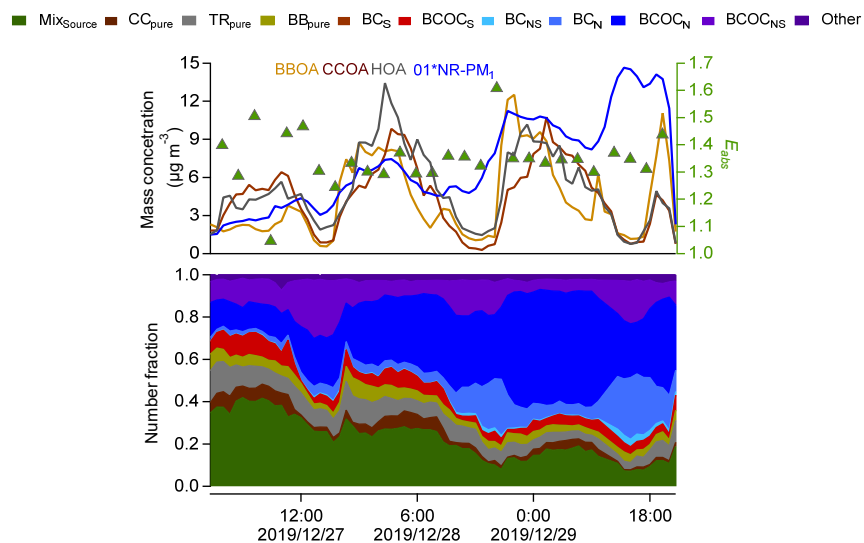

**Figure S3. Temporal variations of  $E_{abs}$ , number fractions of BC-containing particle types and mass concentration of species during pollution case in GC.**

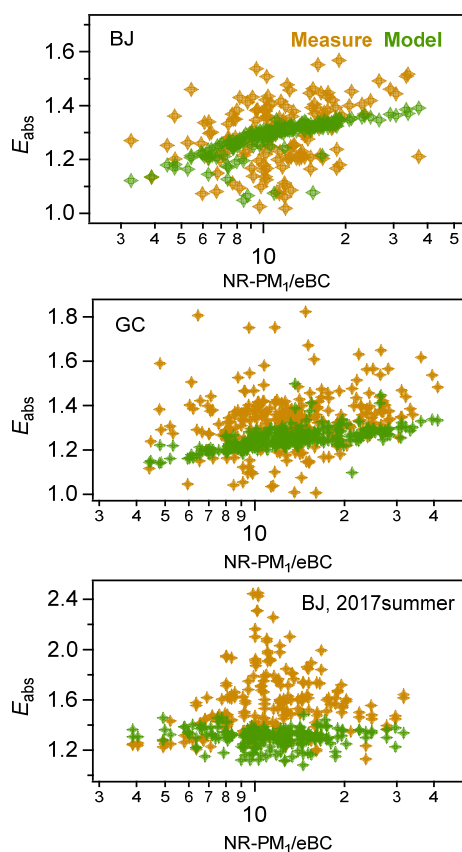

**Figure S4. The comparisons between measured data and model results.**

## References

- Bond, T. C. and Bergstrom, R. W.: Light absorption by carbonaceous particles: an investigative review, *Aerosol Sci. Technol.*, 40, 27-67, 10.1080/02786820500421521, 2006.
- Charlson, R. J., Schwartz, S. E., Hales, J. M., Cess, R. D., Coakley, J. A., Hansen, J. E., and Hofmann, D. J.: Climate forcing by anthropogenic aerosols, *Science*, 255, 423-430, 1992.
- Chen, Y. and Bond, T. C.: Light absorption by organic carbon from wood combustion, *Atmos. Chem. Phys.*, 10, 1773-1787, 2010.
- Chylek, P. and Wong, J.: Effect of aerosols on global budget, *Geophys. Res. Lett.*, 22, 929-931, 1995.
- Wang, Q., Ye, J., Wang, Y., Zhang, T., Ran, W., Wu, Y., Tian, J., Li, L., Zhou, Y., Hang Ho, S. S., Dang, B., Zhang, Q., Zhang, R., Chen, Y., Zhu, C., and Cao, J.: Wintertime optical properties of primary and secondary brown carbon at a regional site in the North China Plain, *Environ. Sci. Technol.*, 53, 12389-12397, 10.1021/acs.est.9b03406, 2019.
